# Supplementary material for: Tissue-Specific Content of Polyunsaturated Fatty Acids in (n-3) Deficiency State of Rats
Source: MDPI journal article supplement (doi:10.3390/foods11020208), 2022-01-12
Supplement: s1 [file s1]

## **SUPPLEMENTAL INFORMATION**

### **Tissue specific content of polyunsaturated fatty acids in (n-3) deficiency state of rats**

Amruta Kulkarni<sup>a</sup>, Ai Zhao<sup>b</sup>, Baoru Yang<sup>a</sup>, Yumei Zhang<sup>c, \*</sup>, Kaisa M. Linderborg<sup>a, \*</sup>

<sup>a</sup> Food Chemistry and Food Development, Department of Life Technologies, University of Turku, Finland

<sup>b</sup> Vanke school of public health, Tsinghua University, Beijing, China

<sup>c</sup> Department of Nutrition & Food Hygiene, School of Public Health, Peking University Health Science Center, Beijing, China

\* Corresponding authors

**Supplemental Figure S1: Animal trial model diagram showing the feeding of two groups and housing system during the experiment.**

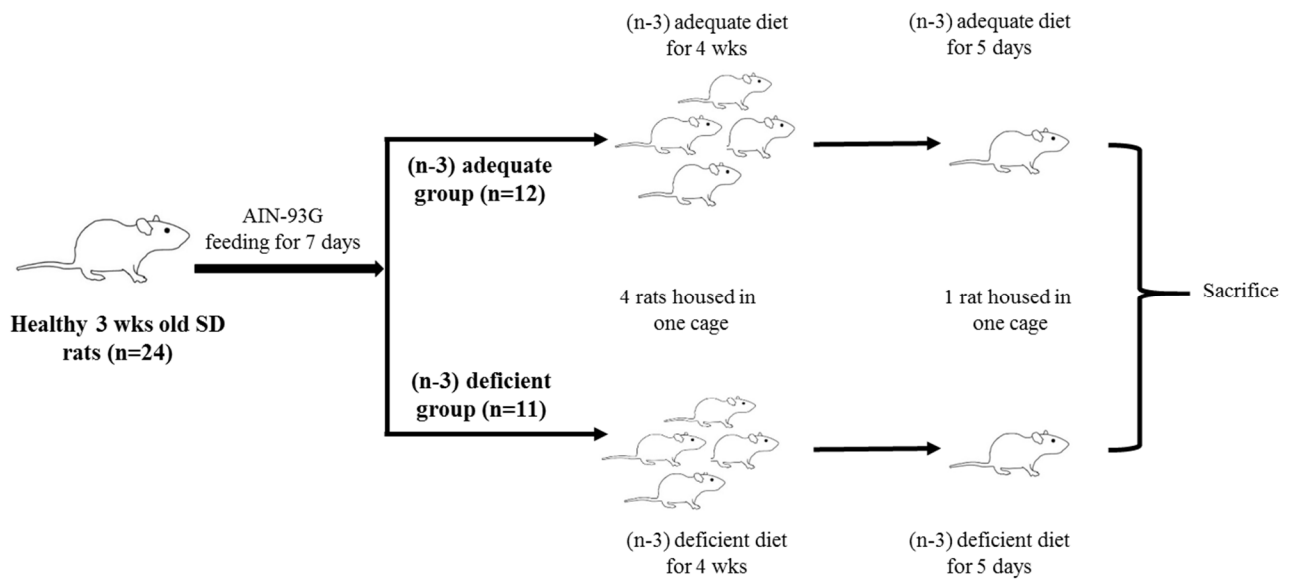

**Supplemental Table S1: Glycerol-bound fatty acids and total (free and esterified) fatty acids ( $\mu\text{g}/100 \text{ mg}$ ) excreted in the rat feces collected during the last 5 days of the experiment.**

| Fatty acids                         | Groups <sup>1</sup>           |                               |                                   |                                  |
|-------------------------------------|-------------------------------|-------------------------------|-----------------------------------|----------------------------------|
|                                     | (n-3) deficient               | (n-3) adequate                | (n-3) deficient                   | (n-3) adequate                   |
|                                     | Glycerol-bound fatty acids    |                               | Total fatty acids                 |                                  |
| 12:0                                | 0.56 $\pm$ 0.14               | 0.54 $\pm$ 0.11               | 2.21 $\pm$ 0.72 <sup>a</sup>      | 2.83 $\pm$ 0.63 <sup>b</sup>     |
| 14:0                                | 4.32 $\pm$ 0.63               | 3.86 $\pm$ 0.53               | 10.57 $\pm$ 2.21 <sup>a</sup>     | 12.44 $\pm$ 1.68 <sup>b</sup>    |
| 14:1(n-5)                           | 0.77 $\pm$ 0.22               | 0.78 $\pm$ 0.19               | 0.17 $\pm$ 0.07                   | 0.24 $\pm$ 0.09                  |
| 16:0                                | 43.12 $\pm$ 5.74 <sup>a</sup> | 37.04 $\pm$ 4.87 <sup>b</sup> | 365.16 $\pm$ 100.2                | 388.19 $\pm$ 80.11               |
| 16:1(n-7)                           | 0.53 $\pm$ 0.09               | 0.52 $\pm$ 0.14               | 2.21 $\pm$ 0.38                   | 2.07 $\pm$ 0.3                   |
| 18:0                                | 15.22 $\pm$ 6.98              | 19.74 $\pm$ 12.77             | 311.71 $\pm$ 75.3                 | 301.73 $\pm$ 70.8                |
| 18:1(n-9), OA                       | 18.84 $\pm$ 4.51 <sup>a</sup> | 12.66 $\pm$ 1.76 <sup>b</sup> | 186.96 $\pm$ 99.24 <sup>a</sup>   | 83.63 $\pm$ 17.57 <sup>b</sup>   |
| 18:1(n-7)                           | 3.5 $\pm$ 0.57                | 3.04 $\pm$ 0.52               | 12.95 $\pm$ 3.79                  | 14.34 $\pm$ 2.8                  |
| 18:2(n-6), LA                       | 6.31 $\pm$ 0.92 <sup>a</sup>  | 7.56 $\pm$ 1.25 <sup>b</sup>  | 58.28 $\pm$ 28.81                 | 63.99 $\pm$ 16.89                |
| 18:3(n-6)                           | 0.24 $\pm$ 0.03               | 0.23 $\pm$ 0.04               | 2.63 $\pm$ 0.27                   | 2.69 $\pm$ 0.71                  |
| 18:3(n-3), ALA                      | 0.2 $\pm$ 0.1 <sup>a</sup>    | 0.42 $\pm$ 0.06 <sup>b</sup>  | 1.14 $\pm$ 0.84 <sup>a</sup>      | 4.64 $\pm$ 1.31 <sup>b</sup>     |
| 20:0                                | 1.71 $\pm$ 0.6 <sup>a</sup>   | 1.09 $\pm$ 0.15 <sup>b</sup>  | 113.34 $\pm$ 20.28 <sup>a</sup>   | 35.73 $\pm$ 5.45 <sup>b</sup>    |
| 20:1(n-9)                           | 1.16 $\pm$ 0.34 <sup>a</sup>  | 0.34 $\pm$ 0.04 <sup>b</sup>  | 16.93 $\pm$ 8.99 <sup>a</sup>     | 2.7 $\pm$ 0.43 <sup>b</sup>      |
| 20:2(n-6)                           | 0.24 $\pm$ 0.05               | 0.26 $\pm$ 0.06               | 1.72 $\pm$ 0.85                   | 2.17 $\pm$ 0.6                   |
| 20:3(n-6)                           | 0.5 $\pm$ 0.15                | 0.39 $\pm$ 0.17               | 2.96 $\pm$ 1.88                   | 2 $\pm$ 1.65                     |
| 20:4(n-6), ARA                      | 1.96 $\pm$ 0.29               | 1.72 $\pm$ 0.53               | 7.13 $\pm$ 1.2 <sup>a</sup>       | 5.18 $\pm$ 1.24 <sup>b</sup>     |
| 20:3(n-3)                           | 0.41 $\pm$ 0.16               | 0.49 $\pm$ 0.23               | 1.33 $\pm$ 0.57                   | 1.01 $\pm$ 0.45                  |
| 20:5(n-3), EPA                      | 0.16 $\pm$ 0.08               | 0.09 $\pm$ 0.05               | 0.09 $\pm$ 0.05 <sup>a</sup>      | 0.16 $\pm$ 0.07 <sup>b</sup>     |
| 22:0                                | 3.53 $\pm$ 1.24 <sup>a</sup>  | 1.94 $\pm$ 0.27 <sup>b</sup>  | 270.11 $\pm$ 40.14 <sup>a</sup>   | 54.1 $\pm$ 7.04 <sup>b</sup>     |
| 22:1(n-9)                           | 0.41 $\pm$ 0.2 <sup>a</sup>   | 0.7 $\pm$ 0.25 <sup>b</sup>   | 7.48 $\pm$ 1.76 <sup>a</sup>      | 3.22 $\pm$ 0.83 <sup>b</sup>     |
| 22:2(n-6)                           | 0.28 $\pm$ 0.12               | 0.32 $\pm$ 0.09               | 5.56 $\pm$ 1.79 <sup>a</sup>      | 4.11 $\pm$ 1.33 <sup>b</sup>     |
| 22:3(n-3)                           | 0.24 $\pm$ 0.06 <sup>a</sup>  | 0.17 $\pm$ 0.07 <sup>b</sup>  | 1.54 $\pm$ 0.38 <sup>a</sup>      | 0.85 $\pm$ 0.22 <sup>b</sup>     |
| 22:4(n-6), DTA                      | 0.71 $\pm$ 0.3                | 0.93 $\pm$ 0.46               | 1.31 $\pm$ 0.84 <sup>a</sup>      | 0.44 $\pm$ 0.15 <sup>b</sup>     |
| 22:5(n-3)                           | 0.02 $\pm$ 0.02               | 0.01 $\pm$ 0                  | 0.21 $\pm$ 0.1                    | 0.17 $\pm$ 0.09                  |
| 24:0                                | 3.92 $\pm$ 0.99               | 3.74 $\pm$ 0.69               | 187.17 $\pm$ 22.2 <sup>a</sup>    | 50.95 $\pm$ 5.27 <sup>b</sup>    |
| 22:6(n-3), DHA                      | 0.13 $\pm$ 0.05               | 0.17 $\pm$ 0.04               | 0.62 $\pm$ 0.21                   | 0.77 $\pm$ 0.26                  |
| 24:1(n-9)                           | 0.12 $\pm$ 0.05               | 0.11 $\pm$ 0.06               | 2.47 $\pm$ 0.99 <sup>a</sup>      | 1.43 $\pm$ 0.36 <sup>b</sup>     |
| <b>Total SFA</b>                    | 72.42 $\pm$ 12.21             | 67.97 $\pm$ 15.7              | 1260.29 $\pm$ 232.35 <sup>a</sup> | 846.01 $\pm$ 164.21 <sup>b</sup> |
| <b>Total MUFA</b>                   | 25.36 $\pm$ 4.84 <sup>a</sup> | 18.17 $\pm$ 2.47 <sup>b</sup> | 229.2 $\pm$ 114.09 <sup>a</sup>   | 107.66 $\pm$ 20.47 <sup>b</sup>  |
| <b>Total (n-6)</b>                  | 10.25 $\pm$ 1.27              | 11.44 $\pm$ 1.93              | 79.64 $\pm$ 30.66                 | 80.62 $\pm$ 18.93                |
| <b>Total (n-3)</b>                  | 1.19 $\pm$ 0.2                | 1.38 $\pm$ 0.28               | 4.96 $\pm$ 1.45 <sup>a</sup>      | 7.62 $\pm$ 1.56 <sup>b</sup>     |
| <b>Total PUFA</b>                   | 11.45 $\pm$ 1.24              | 12.83 $\pm$ 2.17              | 84.6 $\pm$ 31.79                  | 88.24 $\pm$ 20.42                |
| TL ( $\mu\text{g}/100 \text{ mg}$ ) | 141.6 $\pm$ 16.9              | 127.5 $\pm$ 21.5              | 1635.0 $\pm$ 364.0 <sup>a</sup>   | 1098.0 $\pm$ 196.9 <sup>b</sup>  |

<sup>1</sup> The (n-3) deficient and (n-3) adequate groups received peanut oil based (n-3) FA deficient diet and soy bean oil based AIN-93G standard diet respectively for 33 days.

Values are mean ( $\mu\text{g}/100 \text{ mg}$ )  $\pm$  SD, n = 12 for (n-3) adequate group and n = 11 for (n-3) deficient group. Values with different superscripts indicate significant differences between the (n-3) deficient and (n-3) adequate feedings ( $p < 0.05$ ).

SFA: saturated fatty acids; MUFA: monounsaturated fatty acids; PUFA: polyunsaturated fatty acids; TL: Total lipids.

**Supplemental Table S2: Fatty acids of the TAG and PL fractions of fasting rat plasma (% of total fatty acids) of (n-3) deficient and (n-3) adequate groups.**

| Fatty acids           | Groups <sup>1</sup>           |                               |                               |                               |
|-----------------------|-------------------------------|-------------------------------|-------------------------------|-------------------------------|
|                       | (n-3) deficient               | (n-3) adequate                | (n-3) deficient               | (n-3) adequate                |
|                       | TAG                           |                               | PL                            |                               |
| 14:0                  | 1.36±1.19                     | 1.2±1.03                      | 0.2±0.03 <sup>a</sup>         | 0.25±0.03 <sup>b</sup>        |
| 16:0                  | 20.7±1.53 <sup>a</sup>        | 18.29±1.43 <sup>b</sup>       | 23.06±0.87 <sup>a</sup>       | 24.22±0.74 <sup>b</sup>       |
| 16:1(n-7)             | 1.69±0.42 <sup>a</sup>        | 2.35±0.54 <sup>b</sup>        | 0.37±0.09 <sup>a</sup>        | 0.51±0.06 <sup>b</sup>        |
| 18:0                  | 5.6±2.35                      | 5.53±1.47                     | 23.06±1.46 <sup>a</sup>       | 21.05±1.45 <sup>b</sup>       |
| 18:1(n-9), OA         | 28.32±3.3 <sup>a</sup>        | 19.81±2.3 <sup>b</sup>        | 5.18±0.5 <sup>a</sup>         | 3.66±0.3 <sup>b</sup>         |
| 18:1(n-7)             | 2.27±0.34                     | 2.5±0.37                      | 2.41±0.31 <sup>a</sup>        | 3.26±0.47 <sup>b</sup>        |
| 18:2(n-6), LA         | 22.68±1.98 <sup>a</sup>       | 28.24±2.87 <sup>b</sup>       | 10.72±1.56 <sup>a</sup>       | 12.97±1.52 <sup>b</sup>       |
| 18:3(n-6)             | 0.52±0.14                     | 0.58±0.14                     | 0.03±0.01 <sup>a</sup>        | 0.05±0.01 <sup>b</sup>        |
| 18:3(n-3), ALA        | 0.5±0.17 <sup>a</sup>         | 2.19±0.35 <sup>b</sup>        | 0.02±0.01 <sup>a</sup>        | 0.04±0 <sup>b</sup>           |
| 20:0                  | 0.33±0.09                     | 0.42±0.22                     | 0.17±0.08                     | 0.14±0.12                     |
| 20:1(n-9)             | 0.85±0.48                     | 0.74±0.42                     | 0.23±0.04 <sup>a</sup>        | 0.15±0.03 <sup>b</sup>        |
| 20:2(n-6)             | 0.79±0.05 <sup>a</sup>        | 0.54±0.11 <sup>b</sup>        | 0.49±0.15                     | 0.59±0.13                     |
| 20:3(n-6)             | nd <sup>2</sup>               | nd <sup>2</sup>               | 0.5±0.11 <sup>a</sup>         | 0.79±0.12 <sup>b</sup>        |
| 20:4(n-6), ARA        | 11.59±2.64                    | 12.39±4.96                    | 27.72±1.69 <sup>a</sup>       | 24.93±0.91 <sup>b</sup>       |
| 20:5(n-3), EPA        | 0.25±0.29 <sup>a</sup>        | 1.24±0.3 <sup>b</sup>         | 0.01±0 <sup>a</sup>           | 0.05±0 <sup>b</sup>           |
| 22:0                  | 0.2±0.08 <sup>a</sup>         | 0.03±0.01 <sup>b</sup>        | 0.04±0.01 <sup>a</sup>        | 0.02±0 <sup>b</sup>           |
| 22:1(n-9)             | 0.24±0.12                     | 0.39±0.32                     | 0.28±0.11                     | 0.23±0.06                     |
| 22:4(n-6), DTA        | 0.99±0.32 <sup>a</sup>        | 0.33±0.19 <sup>b</sup>        | 1.66±0.4 <sup>a</sup>         | 0.32±0.15 <sup>b</sup>        |
| 22:5(n-3)             | 0.12±0.05                     | 0.09±0.1                      | 0.02±0.01                     | 0.01±0                        |
| 24:0                  | 0.17±0.11 <sup>a</sup>        | 0.47±0.19 <sup>b</sup>        | 0.27±0.05 <sup>a</sup>        | 0.62±0.11 <sup>b</sup>        |
| 22:6(n-3), DHA        | 0.73±0.15 <sup>a</sup>        | 2.58±0.66 <sup>b</sup>        | 3.2±0.44 <sup>a</sup>         | 5.74±0.97 <sup>b</sup>        |
| <b>Total SFA</b>      | <b>28.38±2.98</b>             | <b>25.96±1.63</b>             | <b>46.83±0.99</b>             | <b>46.34±1.01</b>             |
| <b>Total MUFA</b>     | <b>33.39±3.54<sup>a</sup></b> | <b>25.81±2.87<sup>b</sup></b> | <b>8.49±0.77<sup>a</sup></b>  | <b>7.83±0.6<sup>b</sup></b>   |
| <b>Total (n-6) FA</b> | <b>36.59±2.17<sup>a</sup></b> | <b>42.1±3.67<sup>b</sup></b>  | <b>41.14±0.66<sup>a</sup></b> | <b>39.67±1.1<sup>b</sup></b>  |
| <b>Total (n-3) FA</b> | <b>1.61±0.36<sup>a</sup></b>  | <b>6.1±0.56<sup>b</sup></b>   | <b>3.27±0.43<sup>a</sup></b>  | <b>5.87±0.96<sup>b</sup></b>  |
| <b>Total PUFA</b>     | <b>38.21±2.35<sup>a</sup></b> | <b>48.21±3.74<sup>b</sup></b> | <b>44.41±0.75<sup>a</sup></b> | <b>45.54±0.68<sup>b</sup></b> |
| TL (µg/100 mg)        | 54.8±25.1                     | 40.5±16.5                     | 127.7±16.5                    | 125.7±21.0                    |

<sup>1</sup> The (n-3) deficient and (n-3) adequate groups received peanut oil based (n-3) FA deficient diet and soy bean oil based AIN-93G standard diet respectively for 33 days.

Values are mean (relative % of total FAs) ± SD, n = 12 for (n-3) adequate group and n = 11 for (n-3) deficient group. Values with different superscripts indicate significant differences between the (n-3) deficient and (n-3) adequate feedings ( $p < 0.05$ ).

SFA: saturated fatty acids; MUFA: monounsaturated fatty acids; PUFA: polyunsaturated fatty acids; TL: Total lipids.

nd<sup>2</sup>: not detected.

**Supplemental Table S3: Fatty acids of the TAG and PL fractions of rat liver (% of total fatty acids) of (n-3) deficient and (n-3) adequate groups.**

| Fatty acids        | Groups <sup>1</sup>           |                               |                               |                               |
|--------------------|-------------------------------|-------------------------------|-------------------------------|-------------------------------|
|                    | (n-3) deficient               | (n-3) adequate                | (n-3) deficient               | (n-3) adequate                |
|                    | TAG                           |                               | PL                            |                               |
| 12:0               | 0.08±0.02                     | 0.09±0.02                     | 0.03±0.02                     | 0.03±0.02                     |
| 14:0               | 0.82±0.11                     | 0.87±0.18                     | 0.16±0.04                     | 0.2±0.06                      |
| 14:1(n-5)          | 0.1±0.03                      | 0.12±0.03                     | 0.05±0.05                     | 0.07±0.11                     |
| 16:0               | 23.65±1.96                    | 24.01±3.01                    | 15.05±0.48 <sup>a</sup>       | 16.28±0.75 <sup>b</sup>       |
| 16:1(n-7)          | 2.97±0.8                      | 3.68±1.15                     | 0.67±0.13                     | 0.75±0.12                     |
| 18:0               | 4.08±2.41                     | 3.56±1.83                     | 21.76±1 <sup>a</sup>          | 19.89±1.22 <sup>b</sup>       |
| 18:1(n-9), OA      | 34.24±4.42 <sup>a</sup>       | 24.18±2.33 <sup>b</sup>       | 4.5±0.41 <sup>a</sup>         | 3.42±0.36 <sup>b</sup>        |
| 18:1(n-7)          | 3.22±0.5 <sup>a</sup>         | 3.72±0.51 <sup>b</sup>        | 2.66±0.31 <sup>a</sup>        | 3.33±0.56 <sup>b</sup>        |
| 18:2(n-6), LA      | 19.76±2.41 <sup>a</sup>       | 26.96±6.28 <sup>b</sup>       | 9.68±1.11 <sup>a</sup>        | 11.65±1.79 <sup>b</sup>       |
| 18:3(n-6)          | 0.06±0.01 <sup>a</sup>        | 0.26±0.07 <sup>b</sup>        | 0.03±0.01 <sup>a</sup>        | 0.06±0.02 <sup>b</sup>        |
| 18:3(n-3), ALA     | 0.27±0.06 <sup>a</sup>        | 1.7±0.49 <sup>b</sup>         | 0.03±0.02 <sup>a</sup>        | 0.11±0.04 <sup>b</sup>        |
| 20:0               | 0.06±0.02 <sup>a</sup>        | 0.05±0.02 <sup>b</sup>        | 0.08±0.02 <sup>a</sup>        | 0.05±0.01 <sup>b</sup>        |
| 20:1(n-9)          | 0.17±0.07 <sup>a</sup>        | 0.12±0.03 <sup>b</sup>        | 0.15±0.06                     | 0.12±0.03                     |
| 20:2(n-6)          | 0.36±0.1 <sup>a</sup>         | 0.29±0.04 <sup>b</sup>        | 0.38±0.06 <sup>a</sup>        | 0.46±0.05 <sup>b</sup>        |
| 20:3(n-6)          | 0.16±0.07 <sup>a</sup>        | 0.24±0.07 <sup>b</sup>        | 0.61±0.1                      | 0.83±0.1                      |
| 20:4(n-6), ARA     | 7.22±4.01                     | 6.29±2.94                     | 35.05±0.68 <sup>a</sup>       | 31.51±0.91 <sup>b</sup>       |
| 20:3(n-3)          | 0.06±0.03                     | 0.08±0.04                     | 0.08±0.02                     | 0.07±0.02                     |
| 20:5(n-3), EPA     | 0.06±0.02 <sup>a</sup>        | 0.38±0.13 <sup>b</sup>        | 0.02±0.01 <sup>a</sup>        | 0.13±0.03 <sup>b</sup>        |
| 22:0               | 0.02±0.01                     | 0.02±0.02                     | 0.02±0.01 <sup>a</sup>        | 0.01±0.01 <sup>b</sup>        |
| 22:1(n-9)          | 0.04±0.04                     | 0.06±0.07                     | 0.01±0.01                     | 0.01±0.01                     |
| 22:2(n-6)          | 0.03±0.02 <sup>a</sup>        | 0.01±0.01 <sup>b</sup>        | 0.04±0.01 <sup>a</sup>        | 0.02±0.01 <sup>b</sup>        |
| 22:3(n-3)          | 0.43±0.2 <sup>a</sup>         | 0.28±0.06 <sup>b</sup>        | 0.65±0.09 <sup>a</sup>        | 0.32±0.04 <sup>b</sup>        |
| 22:4(n-6), DTA     | 0.65±0.37 <sup>a</sup>        | 0.2±0.09 <sup>b</sup>         | 2.4±0.61 <sup>a</sup>         | 0.45±0.23 <sup>b</sup>        |
| 22:5(n-3)          | 0.02±0.02 <sup>a</sup>        | 0.03±0.02 <sup>b</sup>        | 0.08±0.03                     | 0.1±0.05                      |
| 24:0               | 0.1±0.05 <sup>a</sup>         | 0.31±0.07 <sup>b</sup>        | 0.34±0.07 <sup>a</sup>        | 0.69±0.13 <sup>b</sup>        |
| 22:6(n-3), DHA     | 0.66±0.56 <sup>a</sup>        | 1.66±0.8 <sup>b</sup>         | 4.86±0.55 <sup>a</sup>        | 8.92±1.88 <sup>b</sup>        |
| 24:1(n-9)          | 0.02±0.03                     | 0.01±0.01                     | 0.01±0.01                     | 0.01±0.01                     |
| <b>Total SFA</b>   | <b>28.78±2.32</b>             | <b>28.88±3.46</b>             | <b>37.4±0.67</b>              | <b>37.12±0.84</b>             |
| <b>Total MUFA</b>  | <b>40.74±5.39<sup>a</sup></b> | <b>31.87±3.47<sup>b</sup></b> | <b>8.01±0.63</b>              | <b>7.68±0.67</b>              |
| <b>Total (n-6)</b> | <b>28.21±3.86<sup>a</sup></b> | <b>34.22±5.64<sup>b</sup></b> | <b>48.15±0.63<sup>a</sup></b> | <b>44.95±2.08<sup>b</sup></b> |
| <b>Total (n-3)</b> | <b>1.47±0.69<sup>a</sup></b>  | <b>4.11±0.74<sup>b</sup></b>  | <b>5.71±0.58<sup>a</sup></b>  | <b>9.62±1.86<sup>b</sup></b>  |
| <b>Total PUFA</b>  | <b>29.68±4.42<sup>a</sup></b> | <b>38.32±6.04<sup>b</sup></b> | <b>53.85±0.66<sup>a</sup></b> | <b>54.56±0.72<sup>b</sup></b> |

<sup>1</sup> The (n-3) deficient and (n-3) adequate groups received peanut oil based (n-3) FA deficient diet and soy bean oil based AIN-93G standard diet respectively for 33 days.

Values are mean (relative % of total FAs) ± SD, n = 12 for (n-3) adequate group and n = 11 for (n-3) deficient group. Values with different superscripts indicate significant differences between the (n-3) deficient and (n-3) adequate feedings ( $p < 0.05$ ).

SFA: saturated fatty acids; MUFA: monounsaturated fatty acids; PUFA: polyunsaturated fatty acids.

**Supplemental Table S4: Fatty acid composition of the rat brain, eye, and testis (% of total fatty acids) of (n-3) deficient and (n-3) adequate groups.**

| Fatty acids    | Groups <sup>1</sup>    |                        |                         |                         |                         |                         |
|----------------|------------------------|------------------------|-------------------------|-------------------------|-------------------------|-------------------------|
|                | Brain                  |                        | Eye                     |                         | Testis                  |                         |
|                | (n-3) deficient        | (n-3) adequate         | (n-3) deficient         | (n-3) adequate          | (n-3) deficient         | (n-3) adequate          |
| 12:0           | 0.14±0.09              | 0.12±0.03              | 0.2±0.07                | 0.17±0.06               | 0.17±0.05               | 0.16±0.04               |
| 14:0           | 0.24±0.04              | 0.27±0.06              | 1.34±0.16 <sup>a</sup>  | 1.21±0.1 <sup>b</sup>   | 0.89±0.24               | 0.88±0.23               |
| 14:1(n-5)      | nd <sup>2</sup>        | nd <sup>2</sup>        | 0.12±0.07               | 0.11±0.04               | 0.13±0.05               | 0.12±0.04               |
| 16:0           | 18.28±1.16             | 18.65±0.88             | 20.97±0.6               | 20.86±0.62              | 31.7±2.01               | 32.31±1.89              |
| 16:1(n-7)      | 0.3±0.03               | 0.32±0.03              | 2.89±0.86               | 2.6±0.6                 | 2.32±1.15               | 1.96±0.71               |
| 18:0           | 18.51±0.49             | 18.48±0.63             | 14.93±1.76 <sup>a</sup> | 16.6±1.62 <sup>b</sup>  | 6.22±0.75               | 6.42±0.48               |
| 18:1(n-9), OA  | 14.85±0.85             | 14.49±0.75             | 15.85±2.69 <sup>a</sup> | 13.21±1.62 <sup>b</sup> | 17.25±3.89 <sup>a</sup> | 12.48±2.08 <sup>b</sup> |
| 18:1(n-7)      | 3.17±0.2               | 3.04±0.19              | 3.01±0.15               | 3.14±0.22               | 2.37±0.22               | 2.4±0.19                |
| 18:2(n-6), LA  | 0.61±0.08 <sup>a</sup> | 0.74±0.09 <sup>b</sup> | 5.28±1.94               | 5.75±1.86               | 7.77±1.97               | 9.96±3.08               |
| 18:3(n-6)      | 0.02±0.02              | 0.02±0.01              | 0.12±0.02               | 0.12±0.01               | 0.24±0.17               | 0.13±0.12               |
| 18:3(n-3), ALA | 0.02±0.01              | 0.02±0.01              | 0.13±0.24               | 0.24±0.12               | 0.14±0.07 <sup>a</sup>  | 0.62±0.32 <sup>b</sup>  |
| 20:0           | 0.59±0.17              | 0.54±0.12              | 0.31±0.03               | 0.33±0.06               | 0.15±0.02               | 0.13±0.03               |
| 20:1(n-9)      | 0.45±0.12              | 0.39±0.1               | 0.23±0.06               | 0.18±0.01               | 0.2±0.05 <sup>a</sup>   | 0.11±0.02 <sup>b</sup>  |
| 20:2(n-6)      | 0.24±0.06              | 0.24±0.05              | 0.34±0.02 <sup>a</sup>  | 0.37±0.03 <sup>b</sup>  | 0.25±0.03               | 0.26±0.04               |
| 20:3(n-6)      | 0.39±0.03 <sup>a</sup> | 0.43±0.05 <sup>b</sup> | 0.27±0.03 <sup>a</sup>  | 0.33±0.04 <sup>b</sup>  | 0.83±0.13 <sup>a</sup>  | 1.04±0.12 <sup>b</sup>  |
| 20:4(n-6), ARA | 10.39±1.84             | 10.86±0.6              | 11.72±0.95              | 11.5±0.57               | 14.45±2.49              | 15.24±2.35              |
| 20:3(n-3)      | nd <sup>2</sup>        | nd <sup>2</sup>        | 0.02±0.03               | 0.02±0.02               | 0.1±0.02                | 0.11±0.02               |
| 20:5(n-3), EPA | nd <sup>2</sup>        | nd <sup>2</sup>        | 0.02±0.01 <sup>a</sup>  | 0.1±0.1 <sup>b</sup>    | 0.01±0.01 <sup>a</sup>  | 0.04±0.02 <sup>b</sup>  |
| 22:0           | 1.02±1.38              | 0.55±0.12              | 0.3±0.03                | 0.31±0.09               | 0.13±0.02               | 0.24±0.45               |
| 22:1(n-9)      | 0.22±0.1               | 0.18±0.04              | 0.11±0.03               | 0.1±0.04                | 0.7±0.12                | 0.7±0.14                |
| 22:2(n-6)      | 0.04±0.03              | 0.03±0.01              | 0.05±0.02               | 0.04±0.02               | 0.04±0.01               | 0.05±0.06               |
| 22:3(n-3)      | 2.95±0.5               | 2.83±0.15              | 1.88±0.15 <sup>a</sup>  | 1.64±0.12 <sup>b</sup>  | 1.65±0.28               | 1.71±0.23               |
| 22:4(n-6), DTA | 1.45±0.3 <sup>a</sup>  | 0.73±0.34 <sup>b</sup> | 1.51±0.34 <sup>a</sup>  | 0.54±0.1 <sup>b</sup>   | 11.26±1.89              | 11.55±1.76              |
| 22:5(n-3)      | nd <sup>2</sup>        | nd <sup>2</sup>        | nd <sup>2</sup>         | nd <sup>2</sup>         | nd <sup>2</sup>         | nd <sup>2</sup>         |

|                    |                               |                               |                               |                               |                               |                               |
|--------------------|-------------------------------|-------------------------------|-------------------------------|-------------------------------|-------------------------------|-------------------------------|
| 24:0               | 1.07±0.27                     | 0.97±0.16                     | 0.61±0.16 <sup>a</sup>        | 1.01±0.11 <sup>b</sup>        | 0.09±0.02 <sup>a</sup>        | 0.08±0.02 <sup>b</sup>        |
| 22:6(n-3), DHA     | 13.59±1.93 <sup>a</sup>       | 15.8±1.04 <sup>b</sup>        | 16.9±2.42                     | 18.71±2.55                    | 0.58±0.14 <sup>a</sup>        | 0.94±0.21 <sup>b</sup>        |
| 24:1(n-9)          | 2.03±1.74                     | 1.36±0.32                     | 0.41±0.03                     | 0.42±0.03                     | 0.05±0.02                     | 0.05±0.01                     |
| <b>Total SFA</b>   | <b>39.83±1.57</b>             | <b>39.57±0.98</b>             | <b>38.63±2.15<sup>a</sup></b> | <b>40.45±1.88<sup>b</sup></b> | <b>39.32±2.4</b>              | <b>40.18±1.84</b>             |
| <b>Total MUFA</b>  | <b>20.98±2.56</b>             | <b>19.76±1.3</b>              | <b>22.6±3.31<sup>a</sup></b>  | <b>19.73±2.25<sup>b</sup></b> | <b>22.99±5.14<sup>a</sup></b> | <b>17.78±2.81<sup>b</sup></b> |
| <b>Total (n-6)</b> | <b>13.11±1.74</b>             | <b>13.01±0.7</b>              | <b>19.28±1.45</b>             | <b>18.63±1.88</b>             | <b>34.8±2.56<sup>a</sup></b>  | <b>38.2±1.08<sup>b</sup></b>  |
| <b>Total (n-3)</b> | <b>16.55±2.39<sup>a</sup></b> | <b>18.64±1.01<sup>b</sup></b> | <b>18.93±2.48</b>             | <b>20.7±2.46</b>              | <b>2.46±0.35<sup>a</sup></b>  | <b>3.39±0.16<sup>b</sup></b>  |
| <b>Total PUFA</b>  | <b>29.66±4.08</b>             | <b>31.65±1.33</b>             | <b>38.21±2.04</b>             | <b>39.32±1.39</b>             | <b>37.26±2.87<sup>a</sup></b> | <b>41.59±1.14<sup>b</sup></b> |

<sup>1</sup> The (n-3) deficient and (n-3) adequate groups received peanut oil based (n-3) FA deficient diet and soy bean oil based AIN-93G standard diet respectively for 33 days. Values are mean (relative % of total FAs) ± SD, n = 12 for (n-3) adequate group and n = 11 for (n-3) deficient group. Values with different superscripts indicate significant differences between the (n-3) deficient and (n-3) adequate feedings ( $p < 0.05$ ).

SFA: saturated fatty acids; MUFA: monounsaturated fatty acids; PUFA: polyunsaturated fatty acids.

nd <sup>2</sup>: not detected.

**Supplemental Table S5: Fatty acid composition of the rat visceral fat, heart, and lung (% of total fatty acids) of (n-3) deficient and (n-3) adequate groups.**

| Fatty acids    | Groups <sup>1</sup>     |                         |                         |                         |                         |                         |
|----------------|-------------------------|-------------------------|-------------------------|-------------------------|-------------------------|-------------------------|
|                | Visceral fat            |                         | Heart                   |                         | Lung                    |                         |
|                | (n-3) deficient         | (n-3) adequate          | (n-3) deficient         | (n-3) adequate          | (n-3) deficient         | (n-3) adequate          |
| 12:0           | 0.3±0.03 <sup>a</sup>   | 0.28±0.04 <sup>b</sup>  | 0.32±0.06 <sup>a</sup>  | 0.26±0.07 <sup>b</sup>  | 0.39±0.18               | 0.42±0.12               |
| 14:0           | 1.62±0.32 <sup>a</sup>  | 1.9±0.13 <sup>b</sup>   | 0.94±0.62               | 0.65±0.22               | 2.06±0.26               | 2.2±0.22                |
| 14:1(n-5)      | 0.17±0.06 <sup>a</sup>  | 0.24±0.05 <sup>b</sup>  | 0.1±0.09                | 0.08±0.07               | 0.35±0.15               | 0.29±0.11               |
| 16:0           | 20.75±1.57              | 21.13±1.44              | 14.48±3.74              | 13.45±1.17              | 27.06±2.4               | 28.45±2.19              |
| 16:1(n-7)      | 4.92±0.75 <sup>a</sup>  | 6.09±0.85 <sup>b</sup>  | 1.69±1.79               | 1.22±0.73               | 3.67±1.56               | 4.15±1.44               |
| 18:0           | 2±0.47                  | 2.37±0.51               | 16.71±4.24              | 17.64±1.42              | 8.86±3.19               | 9.1±1.8                 |
| 18:1(n-9), OA  | 10.35±4.1               | 11.01±3.37              | 14.78±8.71 <sup>a</sup> | 7.79±2.61 <sup>b</sup>  | 28.49±6.34 <sup>a</sup> | 20.14±4.09 <sup>b</sup> |
| 18:1(n-7)      | 36.59±3.97 <sup>a</sup> | 21.86±4.04 <sup>b</sup> | 3.5±0.38 <sup>a</sup>   | 3.84±0.35 <sup>b</sup>  | 2.47±0.33 <sup>a</sup>  | 2.75±0.29 <sup>b</sup>  |
| 18:2(n-6), LA  | 20.85±1.04 <sup>a</sup> | 30.92±2.53 <sup>b</sup> | 18.12±2 <sup>a</sup>    | 23.29±1.84 <sup>b</sup> | 12±2.41 <sup>a</sup>    | 15.8±3.63 <sup>b</sup>  |
| 18:3(n-6)      | 0.1±0.02 <sup>a</sup>   | 0.11±0.02 <sup>b</sup>  | 0.02±0.01 <sup>a</sup>  | 0.09±0.03 <sup>b</sup>  | 0.03±0.01 <sup>a</sup>  | 0.12±0.04 <sup>b</sup>  |
| 18:3(n-3), ALA | 0.37±0.06 <sup>a</sup>  | 2.59±0.21 <sup>b</sup>  | 0.08±0.05 <sup>a</sup>  | 0.41±0.18 <sup>b</sup>  | 0.16±0.05 <sup>a</sup>  | 0.89±0.26 <sup>b</sup>  |
| 20:0           | 0.34±0.07 <sup>a</sup>  | 0.13±0.03 <sup>b</sup>  | 0.39±0.1 <sup>a</sup>   | 0.27±0.02 <sup>b</sup>  | 0.42±0.09               | 0.36±0.1                |
| 20:1(n-9)      | 0.58±0.05 <sup>a</sup>  | 0.22±0.02 <sup>b</sup>  | 0.26±0.08 <sup>a</sup>  | 0.1±0.02 <sup>b</sup>   | 0.48±0.04 <sup>a</sup>  | 0.23±0.03 <sup>b</sup>  |
| 20:2(n-6)      | 0.14±0.03 <sup>a</sup>  | 0.2±0.03 <sup>b</sup>   | 0.28±0.06               | 0.28±0.03               | 0.31±0.09               | 0.37±0.08               |
| 20:3(n-6)      | 0.03±0.01 <sup>a</sup>  | 0.08±0.02 <sup>b</sup>  | 0.31±0.09 <sup>a</sup>  | 0.41±0.08 <sup>b</sup>  | 0.33±0.14 <sup>a</sup>  | 0.48±0.14 <sup>b</sup>  |
| 20:4(n-6), ARA | 0.29±0.05 <sup>a</sup>  | 0.41±0.08 <sup>b</sup>  | 19.94±6.65              | 19.68±2.56              | 7.88±3.35               | 8.62±2.7                |
| 20:3(n-3)      | 0.01±0.01 <sup>a</sup>  | 0.04±0.01 <sup>b</sup>  | 0.08±0.03               | 0.09±0.02               | 0.04±0.03 <sup>a</sup>  | 0.07±0.03 <sup>b</sup>  |
| 20:5(n-3), EPA | 0.01±0.01 <sup>a</sup>  | 0.03±0.01 <sup>b</sup>  | 0.02±0.01 <sup>a</sup>  | 0.08±0.03 <sup>b</sup>  | 0.02±0.01 <sup>a</sup>  | 0.14±0.05 <sup>b</sup>  |
| 22:0           | 0.21±0.05 <sup>a</sup>  | 0.06±0.02 <sup>b</sup>  | 0.47±0.11 <sup>a</sup>  | 0.29±0.04 <sup>b</sup>  | 0.52±0.15               | 0.53±0.17               |
| 22:1(n-9)      | 0.03±0.01 <sup>a</sup>  | 0.02±0.01 <sup>b</sup>  | 0.07±0.05               | 0.08±0.12               | 0.22±0.08               | 0.18±0.05               |
| 22:2(n-6)      | 0.01±0.01 <sup>a</sup>  | 0.01±0.01 <sup>b</sup>  | 0.05±0.02 <sup>a</sup>  | 0.03±0.01 <sup>b</sup>  | 0.1±0.05 <sup>a</sup>   | 0.05±0.02 <sup>b</sup>  |
| 22:3(n-3)      | 0.05±0.02 <sup>a</sup>  | 0.07±0.02 <sup>b</sup>  | 1.14±0.27 <sup>a</sup>  | 0.86±0.14 <sup>b</sup>  | 1.68±0.73               | 1.6±0.57                |
| 22:4(n-6), DTA | 0.04±0.02               | 0.04±0.02               | 2.44±1.19 <sup>a</sup>  | 0.8±0.22 <sup>b</sup>   | 0.48±0.23 <sup>a</sup>  | 0.2±0.08 <sup>b</sup>   |
| 22:5(n-3)      | nd <sup>2</sup>         | nd <sup>2</sup>         | 0.27±0.11 <sup>a</sup>  | 0.89±0.23 <sup>b</sup>  | 0.07±0.04 <sup>a</sup>  | 0.37±0.15 <sup>b</sup>  |

|                    |                               |                               |                                |                               |                               |                               |
|--------------------|-------------------------------|-------------------------------|--------------------------------|-------------------------------|-------------------------------|-------------------------------|
| 24:0               | 0.11±0.03 <sup>a</sup>        | 0.02±0.01 <sup>b</sup>        | 0.16±0.03 <sup>a</sup>         | 0.09±0.02 <sup>b</sup>        | 0.46±0.17                     | 0.44±0.14                     |
| 22:6(n-3), DHA     | 0.02±0.01 <sup>a</sup>        | 0.1±0.03 <sup>b</sup>         | 2.97±1.12 <sup>a</sup>         | 6.91±1.22 <sup>b</sup>        | 0.36±0.13 <sup>a</sup>        | 0.92±0.29 <sup>b</sup>        |
| 24:1(n-9)          | 0.03±0.01                     | 0.03±0.01                     | 0.06±0.07                      | 0.03±0.01                     | 0.61±0.29                     | 0.58±0.19                     |
| <b>Total SFA</b>   | <b>25.3±1.66</b>              | <b>25.86±1.85</b>             | <b>33.46±1.33</b>              | <b>32.62±0.83</b>             | <b>39.75±5.43</b>             | <b>41.48±4.15</b>             |
| <b>Total MUFA</b>  | <b>52.65±1.17<sup>a</sup></b> | <b>39.43±2.07<sup>b</sup></b> | <b>20.44±10.47<sup>a</sup></b> | <b>13.12±3.3<sup>b</sup></b>  | <b>36.26±7.58<sup>a</sup></b> | <b>28.29±5.26<sup>b</sup></b> |
| <b>Total (n-6)</b> | <b>21.43±1.03<sup>a</sup></b> | <b>31.74±2.48<sup>b</sup></b> | <b>41.13±9.09</b>              | <b>44.55±2.67</b>             | <b>21.09±1.99<sup>a</sup></b> | <b>25.61±2.53<sup>b</sup></b> |
| <b>Total (n-3)</b> | <b>0.44±0.06<sup>a</sup></b>  | <b>2.81±0.22<sup>b</sup></b>  | <b>4.55±1.44<sup>a</sup></b>   | <b>9.21±1.36<sup>b</sup></b>  | <b>2.3±0.87<sup>a</sup></b>   | <b>3.97±0.8<sup>b</sup></b>   |
| <b>Total PUFA</b>  | <b>21.87±1.02<sup>a</sup></b> | <b>34.55±2.64<sup>b</sup></b> | <b>45.68±10.46<sup>a</sup></b> | <b>53.75±3.24<sup>b</sup></b> | <b>23.39±2.76<sup>a</sup></b> | <b>29.57±2.83<sup>b</sup></b> |

<sup>1</sup> The (n-3) deficient and (n-3) adequate groups received peanut oil based (n-3) FA deficient diet and soy bean oil based AIN-93G standard diet respectively for 33 days. Values are mean (relative % of total FAs) ± SD, n = 12 for (n-3) adequate group and n = 11 for (n-3) deficient group. Values with different superscripts indicate significant differences between the (n-3) deficient and (n-3) adequate feedings ( $p < 0.05$ ).

SFA: saturated fatty acids.

MUFA: monounsaturated fatty acids.

PUFA: polyunsaturated fatty acids.

nd<sup>2</sup>: not detected.
